# Supplementary material for: SANS study of the self-organization of gradient copolymers with ligand groups in supercritical CO2
Source: Royal Society of Chemistry journal article supplement (doi:10.1039/b912268k), 2009-01-01
Supplement: b912268k.pdf [file b912268k.pdf]

## Supporting Information

# Self-organization of gradient copolymers with ligand groups in supercritical CO<sub>2</sub>

*Tiphaine Ribaut<sup>1,2</sup>, Julian Oberdisse<sup>3\*</sup>, Burkhard Annighofer<sup>4</sup>, Ivan Stoychev<sup>5</sup>, Bruno Fournel<sup>5</sup>,  
Stéphane Sarrade<sup>5</sup>, and Patrick Lacroix-Desmazes<sup>1</sup>*

<sup>1</sup> Institut Charles Gerhardt – UMR 5253 CNRS/UM2/ENSCM/UM1, Ingénierie et Architectures Macromoléculaires (IAM), ENSCM, 8 rue de l'Ecole Normale, 34296 Montpellier Cedex 5, France.

<sup>2</sup> Institut de Chimie Séparative de Marcoule, UMR 5257, ICSM Site de Marcoule, BP 17171, 30207 Bagnols Sur Cèze Cedex, France.

<sup>3</sup> Laboratoire des colloïdes, verres et nanomatériaux (LCVN)- UMR 5587 CNRS-UM2, Université Montpellier II, place Eugène Bataillon, 34095 Montpellier Cedex 5, France.

<sup>4</sup> Laboratoire Léon Brillouin, Centre d'Etudes de Saclay, 91191 Gif-sur-Yvette, Cedex, France.

<sup>5</sup> CEA Marcoule DEN/DTCD/SPDE/Laboratoire des Fluides Supercritiques et Membranes (LFSM), BP17171 – 30207 BAGNOLS-SUR-CEZE Cedex, France.

CORRESPONDING AUTHOR FOOTNOTE: Julian Oberdisse, tel.: (+33)467143523; fax: (+33) 467144637; E-mail address: [oberdisse@lcvn.univ-montp2.fr](mailto:oberdisse@lcvn.univ-montp2.fr)

## I. Synthesis of gradient polymers

Gradient copolymers poly(FDA-*co*-AAEM) and poly(FDA-*co*-VBPDE) were synthesized by RAFT polymerization in a batch process from FDA (1,1,2,2-tetrahydroperfluorodecyl acrylate) and AAEM (acetoacetoxyethyl methacrylate), and FDA and VBPDE (vinylbenzylphosphonic acid diethylester) monomers, respectively (Scheme S1). Poly(FDA-*co*-VBPDA) gradient copolymer was efficiently obtained by cleavage of the phosphonic ester groups of poly(FDA-*co*-VBPDE).

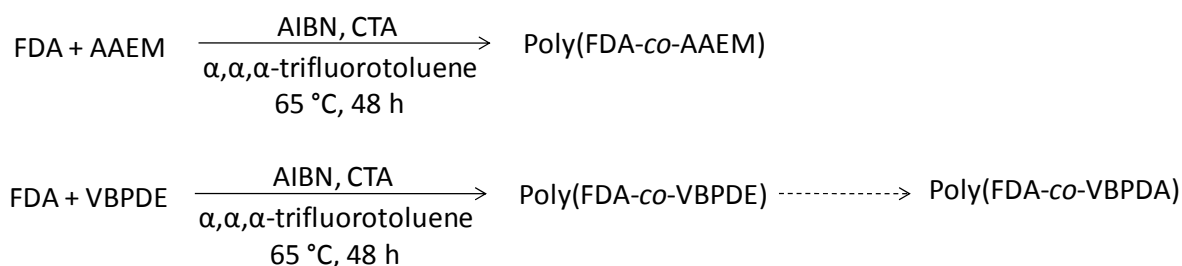

**Scheme S1:** Synthesis of the gradient copolymers from FDA, AAEM and VBPDE monomers at 65 °C in  $\alpha,\alpha,\alpha$ -trifluorotoluene as a solvent. AIBN (Azobis(isobutyronitrile)) is the initiator and CTA is the chain transfer agent 1-(ethoxycarbonyl)-ethyl dithiobenzoate

### 1) Kinetic analyses of the copolymerization

In controlled radical polymerization, all chains grow together and have thus the same molecular weight and composition. The architecture of copolymers only depends on the reactivity ratios of the monomers. To prove the gradient structure of our copolymers, we have confirmed experimentally the difference of reactivities of the monomers by performing kinetic analyses of the copolymerizations. Figures S1 and S2 show the faster consumption of AAEM and VBPDE monomers in comparison with FDA monomer. Monomer conversions were followed by on-line  $^1\text{H}$  NMR

spectroscopy at 65 °C of the crude reaction medium containing C<sub>6</sub>D<sub>6</sub> capillaries for locking. A Bruker DRX 400 spectrometer was used and 16 scans were performed for each spectrum.

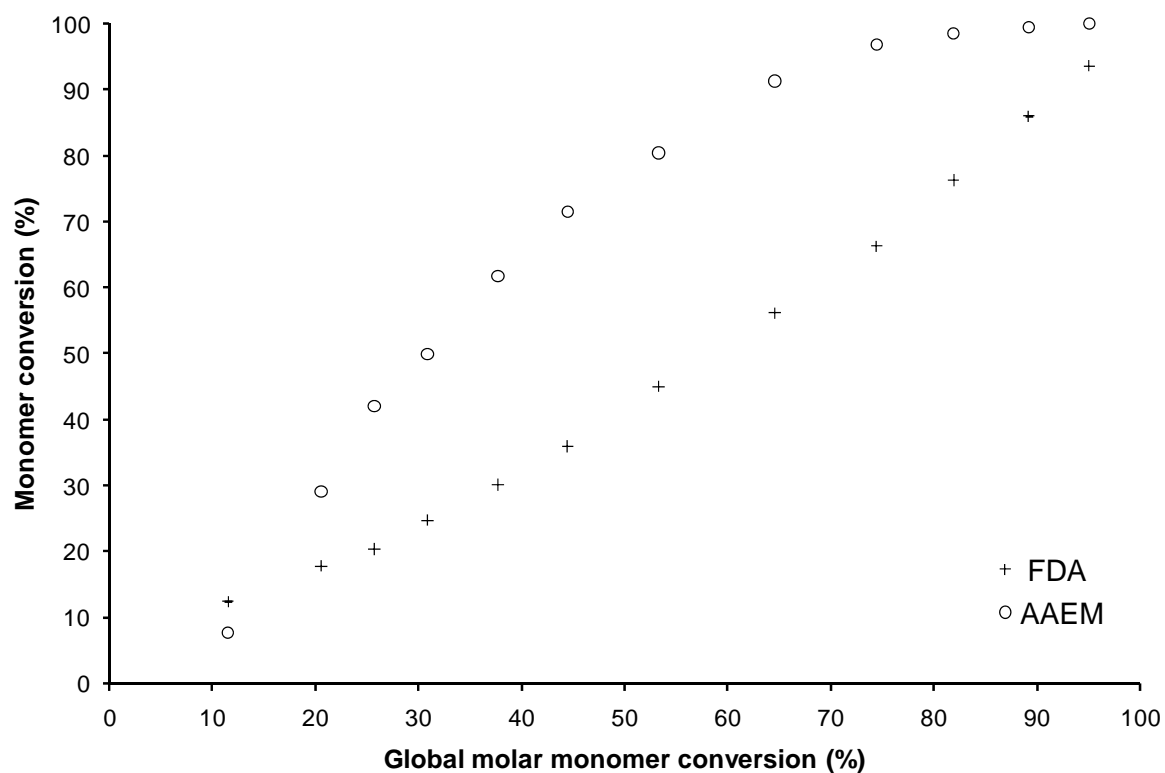

**Figure S1:** Evolution of individual monomer conversions in the copolymerization of AAEM (○) with FDA (+) as a function of the global molar monomer conversion (initial molar fraction of AAEM:  $[AAEM]_0/([AAEM]_0+[FDA]_0)=25.1\%$ )

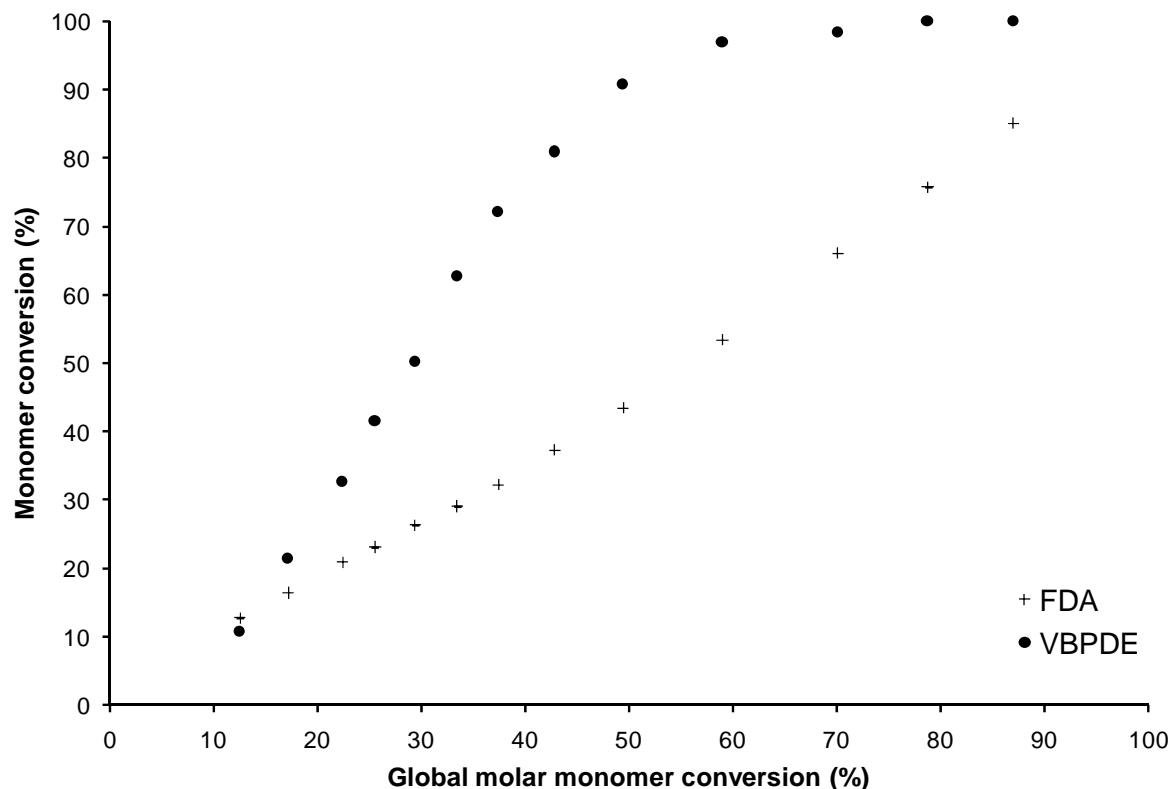

**Figure S2:** Evolution of individual monomer conversions in the copolymerization of VBPDE (•) with FDA (+) as a function of the global molar monomer conversion (initial molar fraction of VBPDE:  $[\text{VBPDE}]_0/([\text{VBPDE}]_0+[\text{FDA}]_0)=14.8\%$ )

## 2) Experimental section

### 1. Materials

1,1,2,2-tetrahydroperfluorodecylacrylate (FDA, Atofina) and acetoacetoxyethyl methacrylate (AAEM, Eastman, 97 %) were purified by passing through activated basic and neutral aluminum oxide respectively. Azobis(isobutyronitrile) (AIBN) was recrystallized in methanol and dried under vacuum.  $\alpha,\alpha,\alpha$ -trifluorotoluene (TFT, Lancaster, 99 %) was distilled before use. VBPDE was synthesized as described in the literature.<sup>1</sup> The chain transfer agent (CTA) 1-(ethoxycarbonyl)-ethyl dithiobenzoate was prepared in 82 % yield with a procedure already described<sup>2</sup> (reaction time of six

hours). 1,1,2 Trichlorotrifluoroethane (F113, Aldrich, 99%), CO<sub>2</sub> (99.99992 %, SFE 5.2, Linde Gas SA, France) and all other chemicals were used as received unless otherwise stated.

## **2. Synthesis of the homopolymer poly(FDA) and the gradient copolymers poly(FDA-*co*-AAEM) and poly(FDA-*co*-VBPDE)**

All polymerizations were carried out with a ratio [AIBN]/[CTA]=0.3 and an initial concentration in monomer of 0.8 g per mL of solvent. In a typical procedure, AIBN, CTA, the monomers and TFT were introduced along with a stir bar in a 100 mL Schlenk flask stopped with a rubber septum. The solution was degassed by freezing in liquid N<sub>2</sub> and thawing under vacuum (26 mmHg) (three cycles), and finally backfilling with argon. The mixture was heated in an oil bath at 65 °C with magnetic stirring for 48 h. Samples were withdrawn from the flask with a glass syringe and stainless steel needle after 24 h and 48 h of reaction and analyzed by <sup>1</sup>H NMR. At the end of the polymerization, TFT was evaporated at 45 °C under vacuum, the polymer was washed three times with n-pentane 95 % under magnetic stirring and then dried under vacuum at room temperature.

## **3. Chemical modification of poly(FDA-*co*-VBPDE) to form poly(FDA-*co*-VBPDA)**

In a typical procedure, poly(FDA-*co*-VBPDE) (3 g) were dissolved in TFT (12.6 mL) in a 50 mL Schlenk flask equipped with a magnetic stir bar. Air was removed from the solution by argon bubbling. Trimethylsilyl bromide (0.53 g, 3.46 mmol, 2.8 eq versus VBPDE units) was added dropwise via a syringe and the mixture was stirred at room temperature for 4 days. The cleavage of the phosphonic ester groups was followed with <sup>1</sup>H NMR spectroscopy. Then, methanol (2 mL) was added and the mixture was stirred at room temperature for one night. The mixture TFT/methanol was evaporated at 45 °C under vacuum. The polymer was washed three times with acetonitrile under magnetic stirring, and then dried under vacuum at room temperature (yield: 95 %).

**II. Physico-chemical properties of gradient copolymers:****Table S1:** Characteristics of the gradient copolymers

|                                                   | Theoretical<br>$M_n^a$<br>(g/mol) | $M_n$<br>(chain-end<br>$^1H$ -NMR<br>analysis) <sup>b</sup><br>(g/mol) | Theoretical<br>molar fraction of<br>$M_2$ (theoretical<br>weight fraction) <sup>c</sup><br>(%) | $^1H$ NMR analysis:<br>molar fraction of<br>$M_2$ (weight<br>fraction) <sup>d</sup><br>(%) | Cloud point<br>pressures at 4<br>% wt <sup>e</sup> (bar) |       |
|---------------------------------------------------|-----------------------------------|------------------------------------------------------------------------|------------------------------------------------------------------------------------------------|--------------------------------------------------------------------------------------------|----------------------------------------------------------|-------|
|                                                   |                                   |                                                                        |                                                                                                |                                                                                            | 40 °C                                                    | 55 °C |
| Poly(FDA- <i>co</i> -<br>AAEM) 17 %<br>mol AAEM   | 16000                             | 19000                                                                  | 16.8<br>(7.7)                                                                                  | 14.3<br>(6.4)                                                                              | 130                                                      | 177   |
| Poly(FDA- <i>co</i> -<br>AAEM) 28 %<br>mol AAEM   | 16300                             | 22000                                                                  | 27.5<br>(13.6)                                                                                 | 24.2<br>(11.6)                                                                             | 158                                                      | 206   |
| Poly(FDA- <i>co</i> -<br>VBPDE) 20 %<br>mol VBPDE | 14500                             | 16000                                                                  | 20.2<br>(11.0)                                                                                 | 18.9<br>(10.3)                                                                             | 133                                                      | 178   |
| Poly(FDA- <i>co</i> -<br>VBPDE) 17 %<br>mol VBPDE | 34100                             | 42000                                                                  | 16.9<br>(9.0)                                                                                  | 12.9<br>(6.8)                                                                              | 143                                                      | 190   |
| Poly(FDA- <i>co</i> -<br>VBPDA) 19 %<br>mol VBPDA | 12900                             | 11800                                                                  | 18.8<br>(8.2)                                                                                  | 16.3<br>(6.9)                                                                              | 138                                                      | 183   |
| Poly(FDA- <i>co</i> -<br>VBPDA) 23 %<br>mol VBPDA | 11000                             | 15700                                                                  | 23.0<br>(10.2)                                                                                 | 22.5<br>(10.0)                                                                             | 147                                                      | 193   |

<sup>a</sup> Theoretical  $M_n$  calculated by:

$$M_n = \frac{m_{FDA} \times \text{conv}(FDA) + m_{M_2} \times \text{conv}(M_2)}{n_{CTA}} + M(CTA) = \frac{m_{monomers} \times \text{overall weight conversion}}{n_{CTA}} + M(CTA)$$

where  $m_{FDA}$  and  $m_{M_2}$  are respectively the initial masses of FDA and  $M_2$  (AAEM or VBPDE),  $\text{conv}(FDA)$  and  $\text{conv}(M_2)$  are the conversions of FDA and  $M_2$  given by  $^1\text{H-NMR}$  analysis of the crude reaction medium, and  $n_{CTA}$  and  $M(CTA)$  are the number of moles and the molecular weight of the chain transfer agent.

<sup>b</sup>  $M_n$  determined by  $^1\text{H-NMR}$  chain-end analysis ( $-\text{CH}_2-\text{CHX}-\text{S}-\text{C}(\text{S})\text{Ph}$ ) of the purified polymer. For poly(FDA-*co*-AAEM), intensity of a chain-end proton is the average of the intensity of a phenyl proton ( $\delta=7.25-7.9$  ppm). For poly(FDA-*co*-VBPDE) and poly(FDA-*co*-VBPDA), intensity of a chain-end proton is the intensity of proton in alpha of the dithiobenzoate group ( $\delta=4.9$  ppm).

<sup>c</sup> Molar fraction of  $M_2$  calculated from monomer conversions according to:

$$\frac{n_{M_2} \times \text{conv}(M_2)}{n_{FDA} \times \text{conv}(FDA) + n_{M_2} \times \text{conv}(M_2)}$$

<sup>d</sup> Molar fraction of  $M_2$  determined by  $^1\text{H-NMR}$  of the washed polymer. Weight fraction is given by:

$$\frac{\text{molar fraction of } M_2 \times M(M_2)}{\text{molar fraction of } M_2 \times M(M_2) + \text{molar fraction of FDA} \times M(FDA)}$$

where  $M(FDA)$  and  $M(M_2)$  are the molecular weights of FDA and  $M_2$  (AAEM or VBPDE).

<sup>e</sup> Concentration of polymer versus  $\text{CO}_2$

### III. Scattering data

#### 1) Determination of scattering length densities

Scattering length densities of pure  $\text{CO}_2$  at the different conditions are given in Table S2.

**Table S2:** Scattering length densities for  $\text{CO}_2$

| $\rho(\text{CO}_2) (10^{10} \times \text{cm}^{-2})$ |                      |                      |                      |                      |
|-----------------------------------------------------|----------------------|----------------------|----------------------|----------------------|
| T=40°C,<br>P=140 bar                                | T=40°C,<br>P=155 bar | T=40°C,<br>P=210 bar | T=40°C,<br>P=350 bar | T=55°C,<br>P=210 bar |
| 1.91                                                | 1.97                 | 2.12                 | 2.34                 | 1.92                 |

The volumes of one gram of copolymer poly(FDA-*co*-AAEM) (Table S3) have been estimated by using the densities determined at ambient pressure and temperature:  $d(\text{poly}(\text{FDA}))=1.70 \text{ g/mL}^3$  and  $d(\text{poly}(\text{AAEM}))=1.263 \text{ g/mL}^4$ . In the same way, the volumes of one gram of poly(FDA-*co*-VBPDE) and poly(FDA-*co*-VBPDA) (Table S3) have been calculated with the approximation that  $d(\text{poly}(\text{VBPDE}))=d(\text{poly}(\text{VBPDA}))=d(\text{poly}(\text{styrene}))=1.05 \text{ g/mL}^5$ .

**Table S3:** Scattering length densities for copolymers

| Gradient copolymers                                                   | $\rho (10^{10} \times \text{cm}^{-2})$ |
|-----------------------------------------------------------------------|----------------------------------------|
| Poly(FDA- <i>co</i> -AAEM) 17 % mol AAEM                              | 3.14                                   |
| Poly(FDA- <i>co</i> -AAEM) 28 % mol AAEM                              | 3.00                                   |
| Poly(FDA- <i>co</i> -VBPDE) 20 % mol VBPDE, $M_n=14500 \text{ g/mol}$ | 2.93                                   |
| Poly(FDA- <i>co</i> -VBPDE) 17 % mol VBPDE, $M_n=34100 \text{ g/mol}$ | 2.99                                   |
| Poly(FDA- <i>co</i> -VBPDA) 19 % mol VBPDA                            | 3.07                                   |
| Poly(FDA- <i>co</i> -VBPDA) 23 % mol VBPDA + D <sub>2</sub> O         | 3.11                                   |

## 2) Volumes of the polymer

**Table S4:** Volumes of one gram of gradient copolymer and dry volume of individual polymer chains  $V_{\text{pol}}$ 

| Gradient copolymers                                                   | Volume of one gram of copolymer (mL) | Dry volumes of individual polymer chains $V_{\text{pol}} (\text{nm}^3)$ |
|-----------------------------------------------------------------------|--------------------------------------|-------------------------------------------------------------------------|
| Poly(FDA- <i>co</i> -AAEM) 17 % mol AAEM                              | 0.616                                | 16.2                                                                    |
| Poly(FDA- <i>co</i> -AAEM) 28 % mol AAEM                              | 0.604                                | 16.8                                                                    |
| Poly(FDA- <i>co</i> -VBPDE) 20 % mol VBPDE, $M_n=14500 \text{ g/mol}$ | 0.621                                | 15.5                                                                    |
| Poly(FDA- <i>co</i> -VBPDE) 17 % mol VBPDE, $M_n=34100 \text{ g/mol}$ | 0.628                                | 35.5                                                                    |
| Poly(FDA- <i>co</i> -VBPDA) 19 % mol VBPDA                            | 0.604                                | 13.5                                                                    |
| Poly(FDA- <i>co</i> -VBPDA) 23 % mol VBPDA                            | 0.663                                | 11.8                                                                    |



#### IV. Intra-chain hydrogen bonding

It can be supposed that the evolution of the self-assembly at fixed CO<sub>2</sub>-density is here the effect of the hydrogen bonding on the aggregation. Schlaad et al. proposed the establishment of hydrogen bonding between acetoacetoxy groups in the homopolymer poly(AAEM),<sup>6</sup> cf. Figure S3 below. With increasing temperature, these interactions weaken and may compensate the effect of the decrease of the density of CO<sub>2</sub> which favors aggregation.

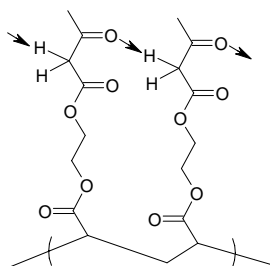

**Figure S3:** Hypothesis of hydrogen-bonding interactions between aceto acetoxy units of poly(AAEM)<sup>6</sup>

#### V. Influence of concentration on self-assembly

In Figure S4 SANS data for poly(FDA-*co*-AAEM) gradient copolymer are shown in a reduced representation  $I(q)/\phi$ , where  $\phi$  is the volume fraction. In absence of interactions, concentrations has no effect on  $I/\phi$  if the aggregates do not evolve. This plot thus clearly proves that the mean aggregation number increases with increasing concentration.

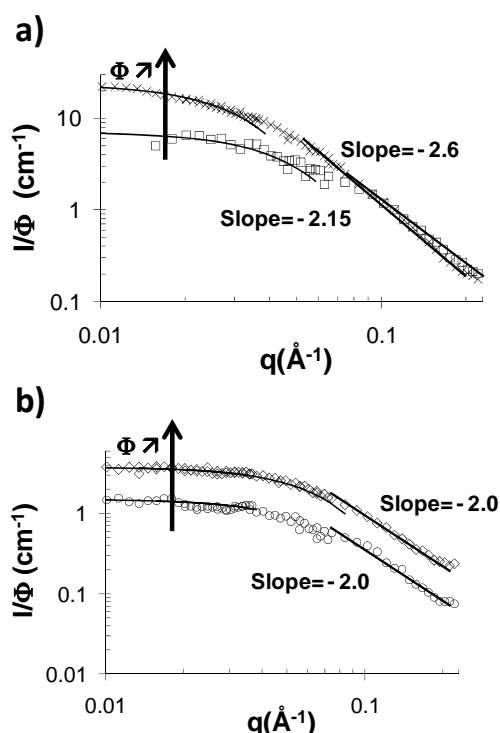

**Figure S4:** Influence of concentration. SANS data for poly(FDA-*co*-AAEM) gradient copolymer 17 % mol AAEM. a) at  $T=40$  °C,  $P=140$  bar,  $C=4$  % wt ( $\square$ ) and 8 % wt ( $\times$ ) of polymer vs.  $\text{CO}_2$ ; b) at  $T=40$  °C,  $P=210$  bar,  $C=4$  % wt ( $\circ$ ) and 8 % wt ( $\diamond$ ) of polymer vs.  $\text{CO}_2$ ; corresponding Guinier plots in the domain  $qR_g < 2$  for readability reasons. The arrows indicate the evolution with increasing volume fraction of polymer.

## VI. References

- 1 R. Frantz, J.-O. Durand, F. Carre, G. F. Lanneau, J. Le Bideau, B. Alonso and D. Massiot. *Chem--Eur. J.* 2003, **9**, 770-775.
- 2 R. Severac, P. Lacroix-Desmazes and B. Boutevin. *Polym. Int.* 2002, **51**, 1117-1122.
- 3 J. D. Londono, R. Dharmapurikar, H. D. Cocharn, G. D. Wignall, J. B. McClain, D. E. Betts, D. A. Canelas, J. M. DeSimone, E. T. Samulski, D. Chillura-Martino and R. Triolo. *J. Appl. Crystallogr.* 1997, **30**, 690-695.
- 4 T. Krasia, R. Soula, G. Borner Hans and H. Schlaad. *Chem. comm.* 2003, 538-9.
- 5 *Polymer Handbook, 4th edition*, Brandrup, J.; Immergut, E. H.; Grulke, E. A. ed.; Wiley-Interscience, 1999.
- 6 H. Schlaad, T. Krasia and M. Antonietti. *J. Am. Chem. Soc.* 2004, **126**, 11307-11310.
